# Supplementary material for: Wilms Tumor Gene on X Chromosome (WTX) Inhibits Degradation of NRF2 Protein through Competitive Binding to KEAP1 Protein
Source: PubMed Central journal article supplement — J Biol Chem. 2012 Jan 3;287(9):6539–50. doi: 10.1074/jbc.M111.316471 (PMC3307315; doi:10.1074/jbc.m111.316471), 2012-01-03

Supplemental data, Camp et al.

Figure S1.

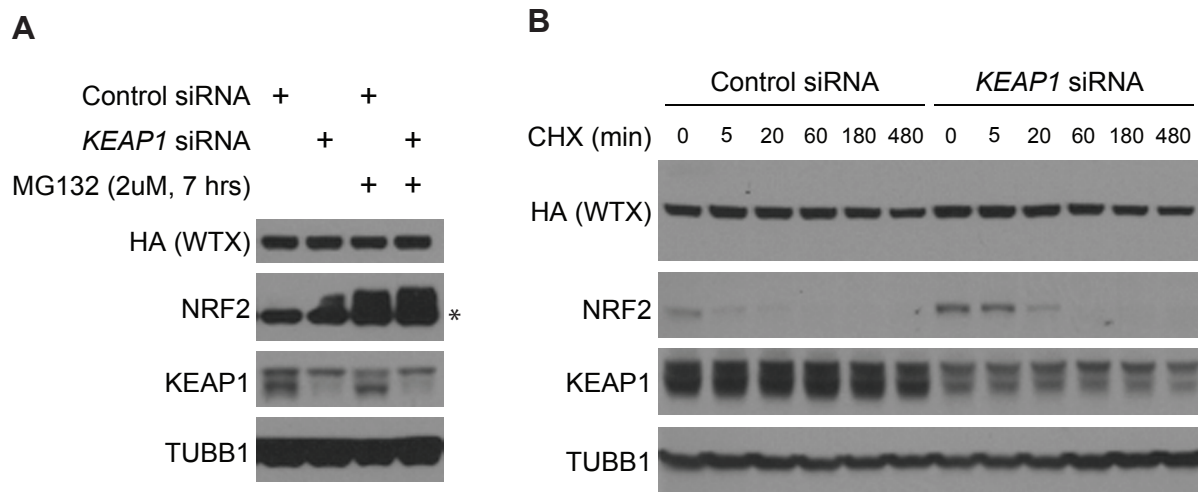

**Figure S1. The steady-state levels of WTX are not regulated by KEAP1.** (A) HEK293T cells stably expressing GLUE-WTX were transfected with either control siRNA or siRNA targeting *KEAP1*. Approximately 48 hours post transfection, cells were treated with MG132 for 7 hours. Cells were lysed in RIPA buffer and lysates were analyzed by Western blot. \* indicates a non-specific band. (B) HEK293T cells stably expressing GLUE-WTX were transfected with either control siRNA or siRNA targeting *KEAP1*. Approximately 48 hours post transfection, cells were treated with 10  $\mu$ g/mL Cycloheximide (CHX) as indicated. Cells were lysed in RIPA buffer and lysates were analyzed by Western blot.

Figure S2. MS/MS spectra of phosphopeptides identified in GLUE-WTX complexes (related to Table I in the main text).

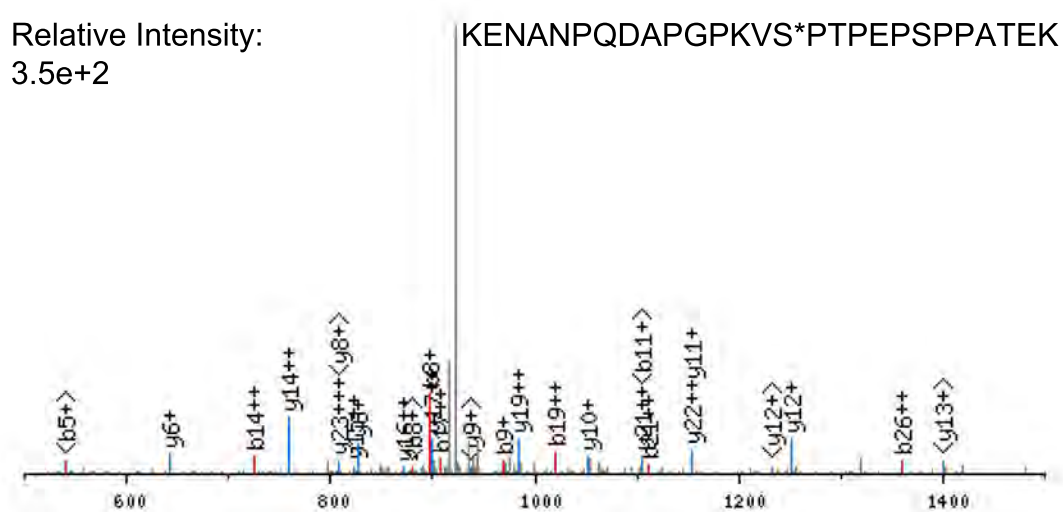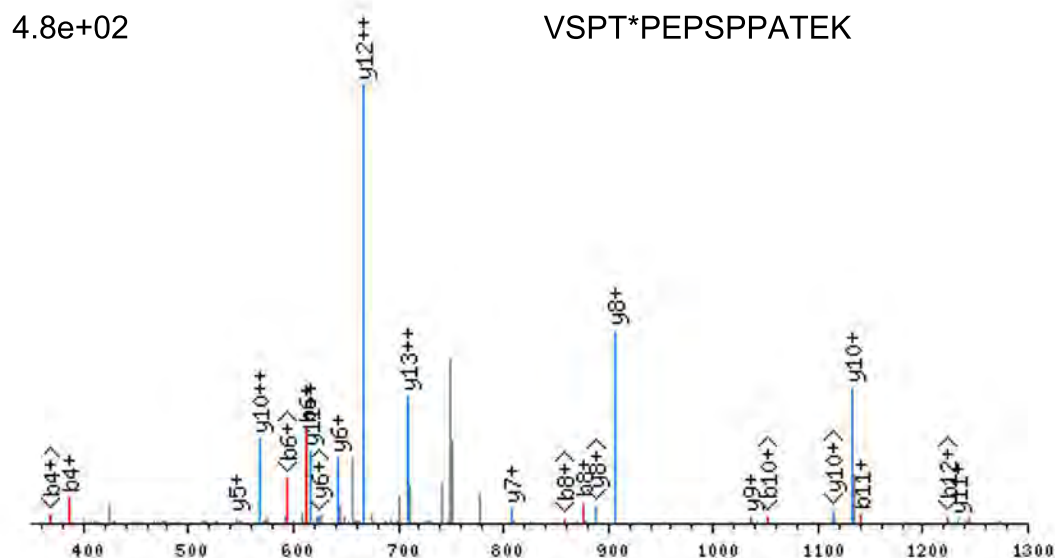

Figure S2 continued.

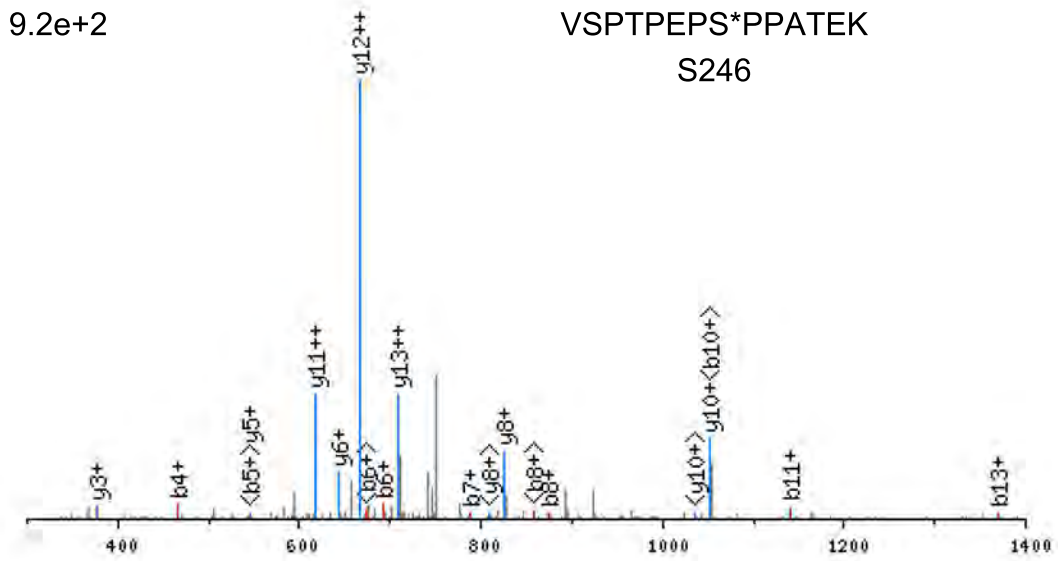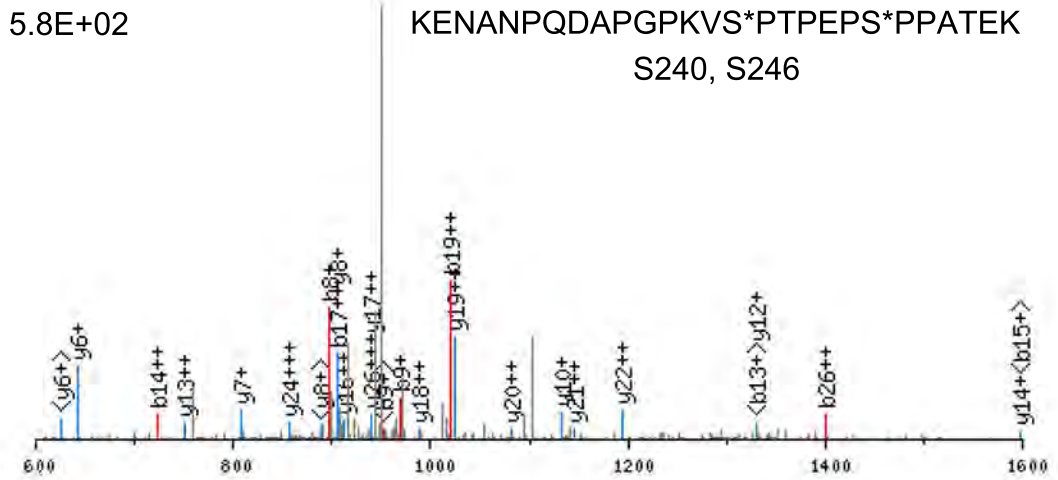

Figure S2 continued.

3.1e+02

VSPT\*PEPS\*PPATEK  
T242, S246

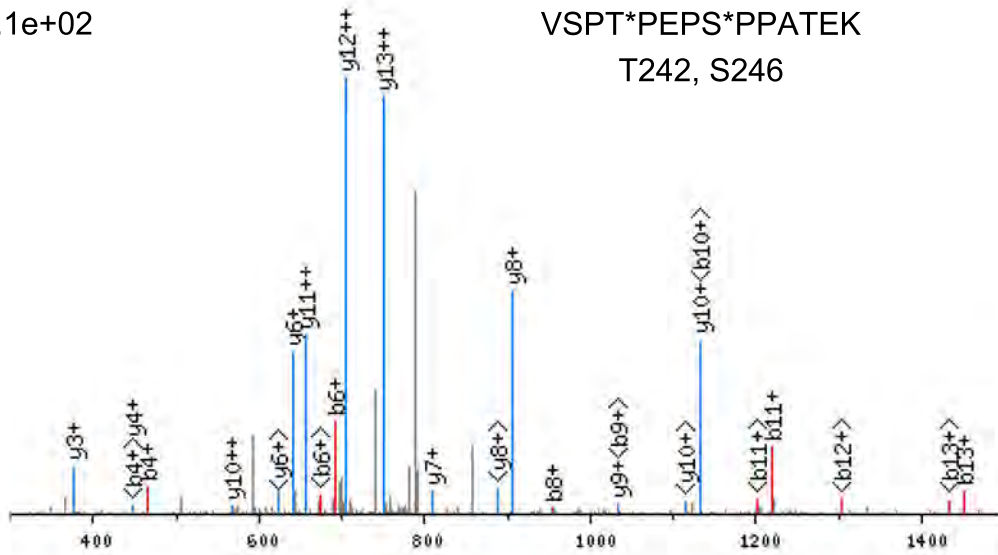

1.4e+04

PAPEASS\*LLEPHSPETGEK  
S280

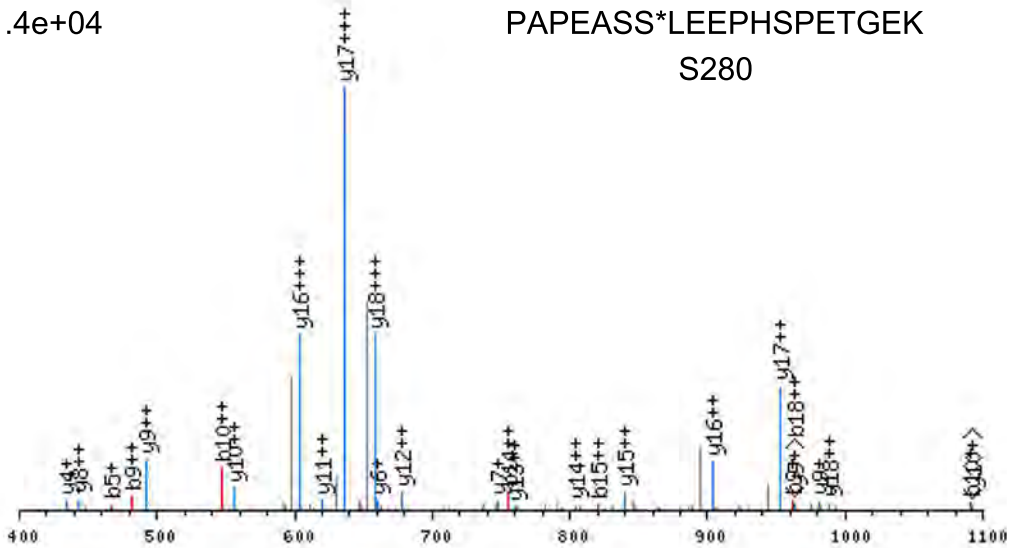



Figure S2 continued.

8.4e+03

PAPEASSLEEPHS\*PETGEK  
S286

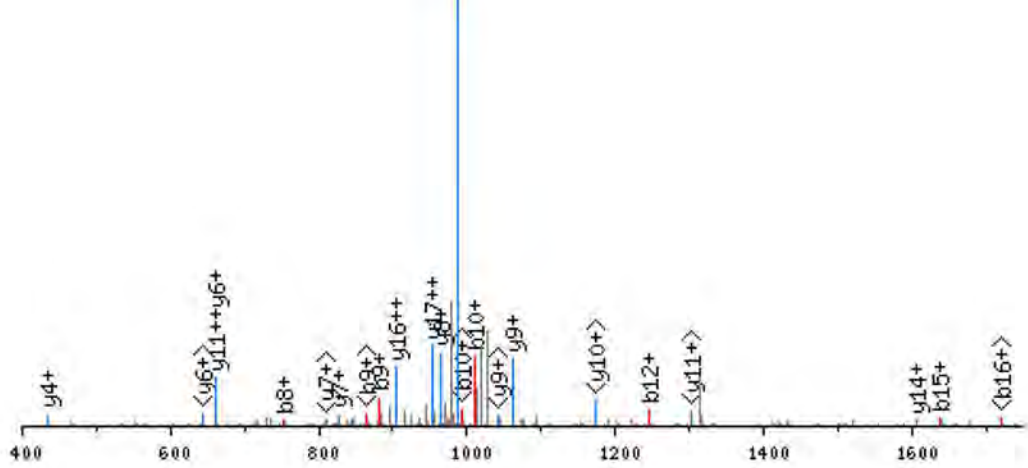

6.1e+02

PAPEASS\*LLEEPHS\*PETGEK  
S280, S286

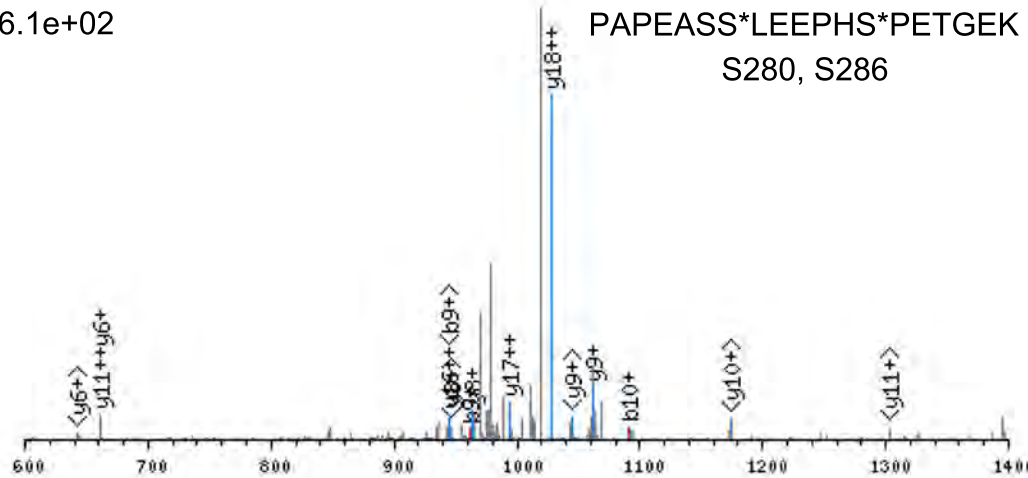

Figure S2 continued.

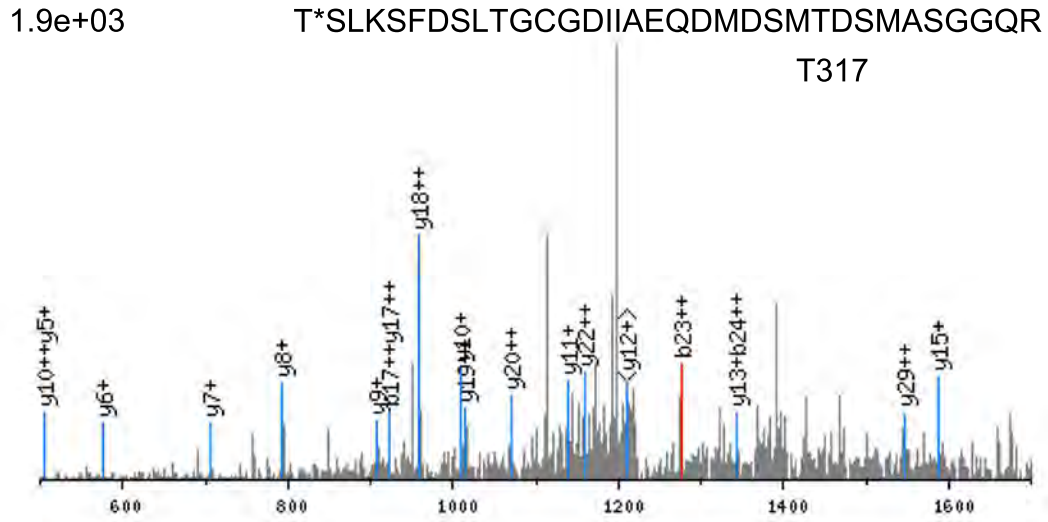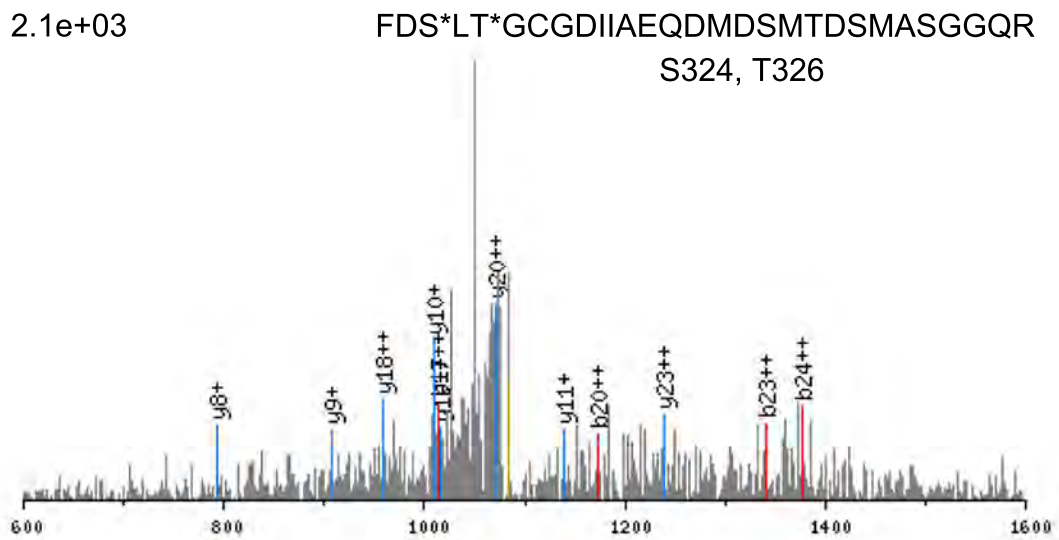

Figure S2 continued.

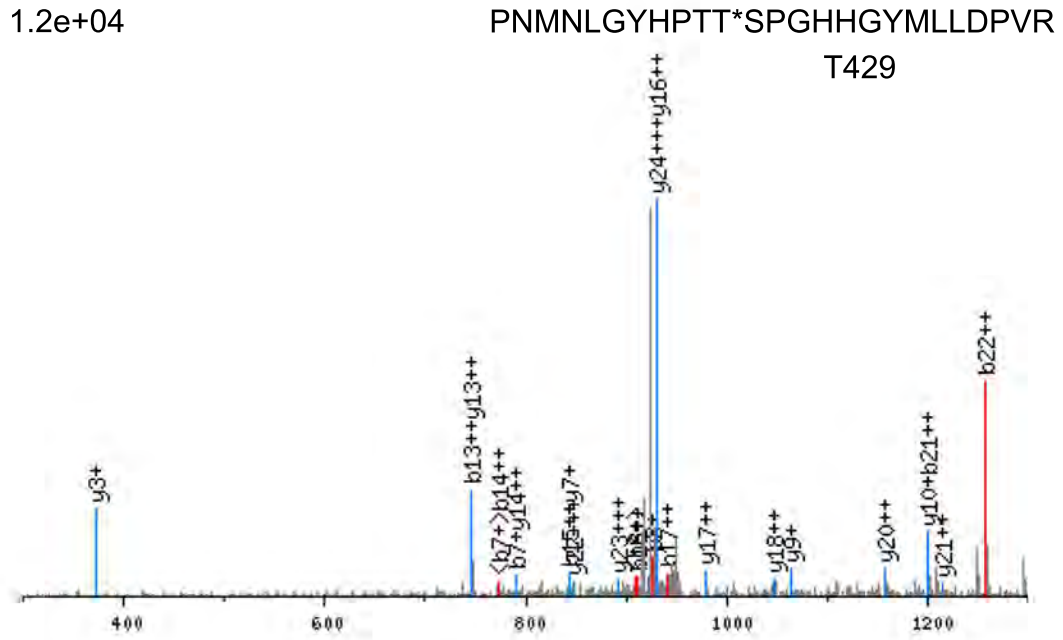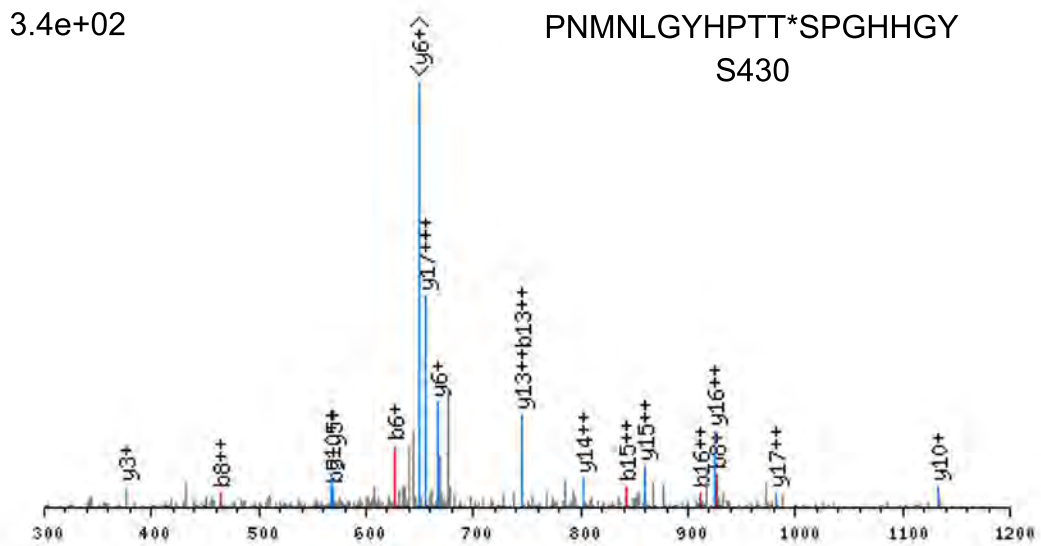

Figure S2 continued.

2.4e+04

DSYSGDALYEFYEPDDSLNS\*PPGDDCLY\*DLH  
S518, Y526

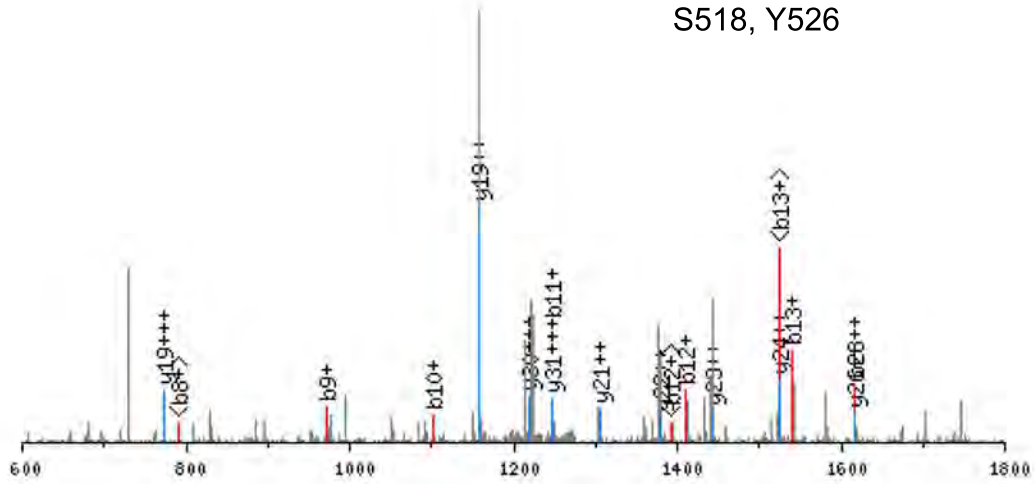

2.1e+05

SSEMFDPFLNFEPFLSS\*RPPGAMET\*EEE  
S548, T556

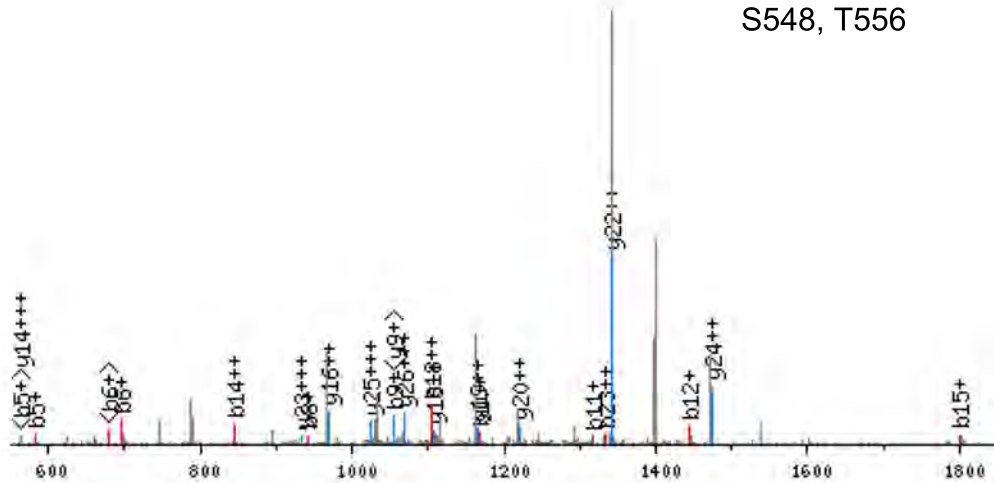

Figure S2 continued.

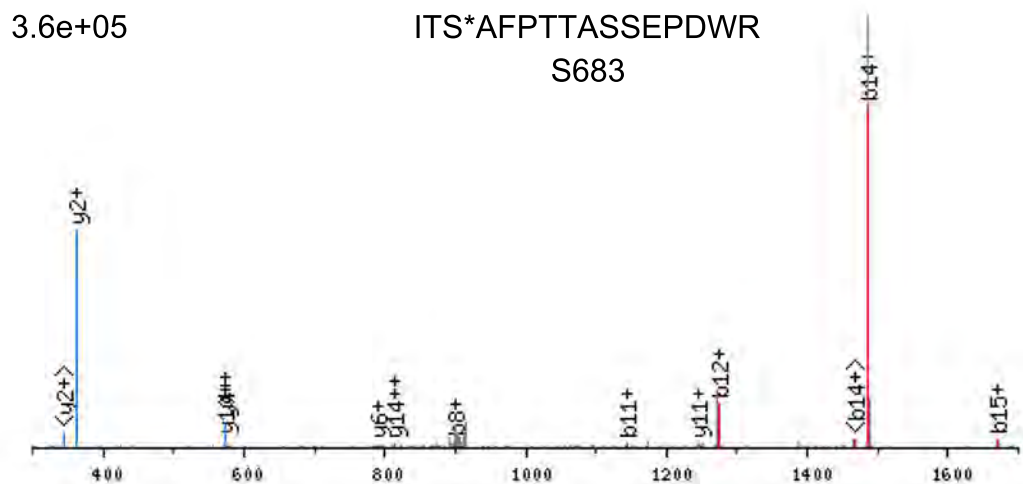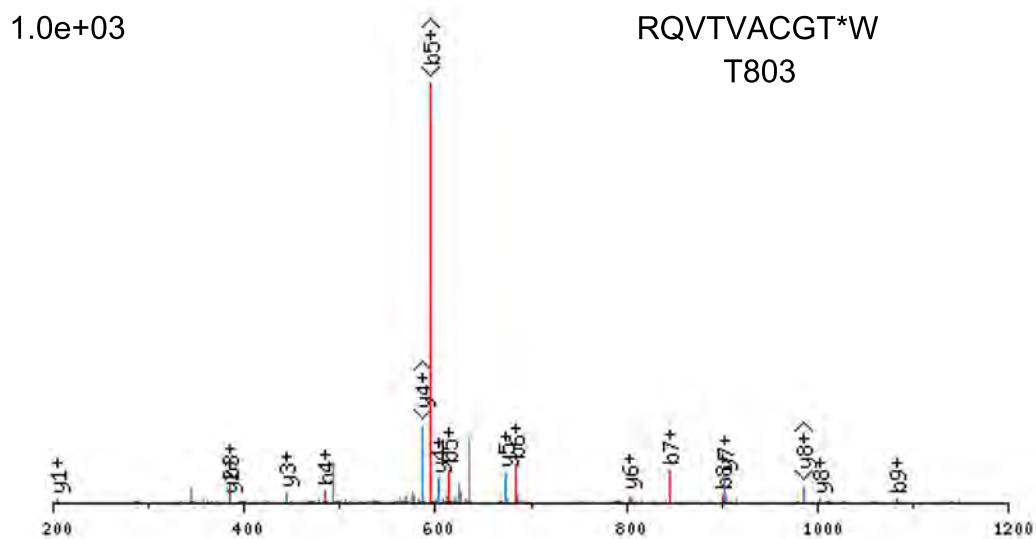



Figure S3 continued.

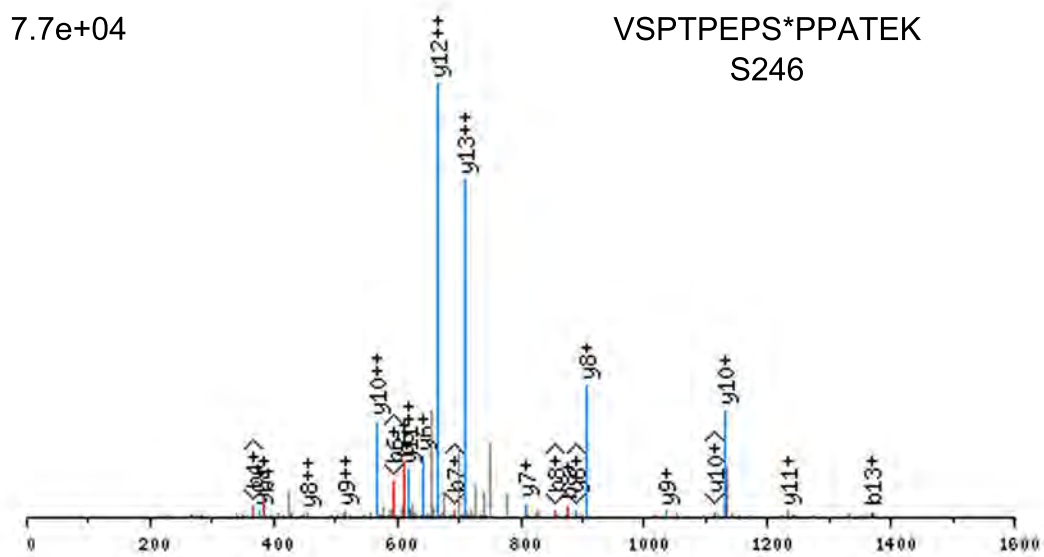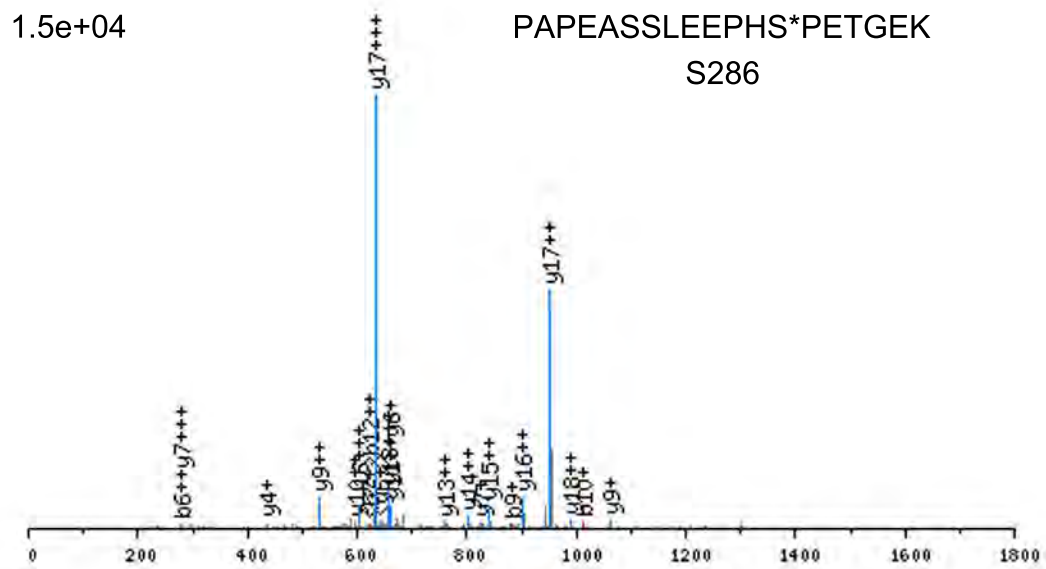

Figure S3 continued.

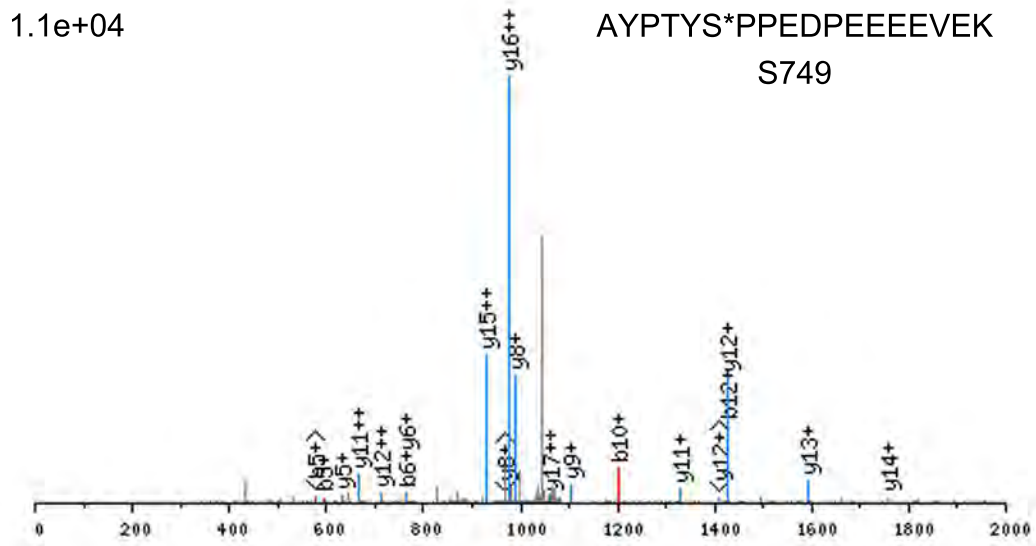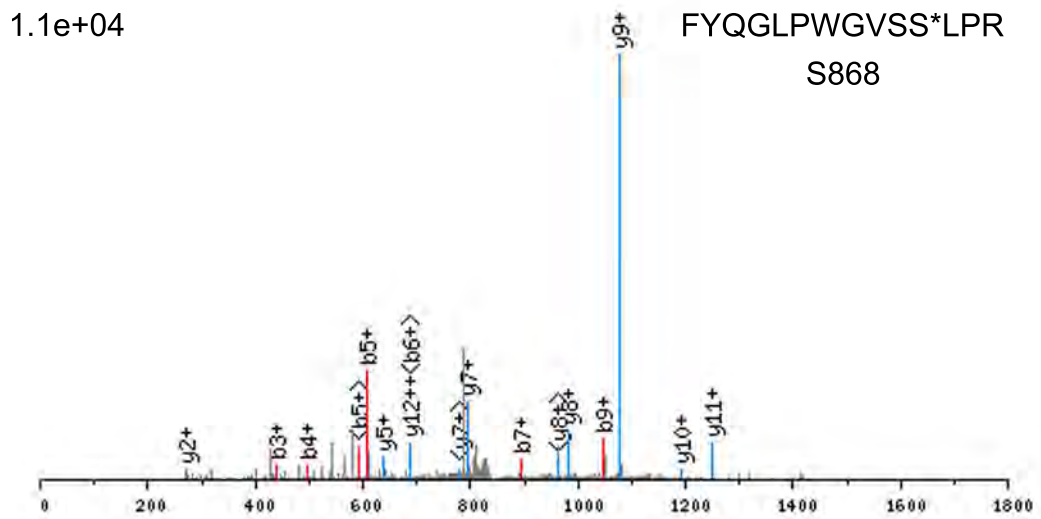

Supplement: supp_M111.316471_jbc.M111.316471-1.pdf [file supp_M111.316471_jbc.M111.316471-1.pdf]
